# Supplementary material for: Copper oxide as efficient catalyst for oxidative dehydrogenation of alcohols with air
Source: Royal Society of Chemistry journal article supplement (doi:10.1039/c4cy01622j), 2015-01-01
Supplement: c4cy01622j1.pdf [file c4cy01622j1.pdf]

## SUPPORTING INFORMATION

### Copper Oxide as Efficient Catalyst for Oxidative Dehydrogenation of Alcohols with Air

Raju Poreddy, Christian Engelbrekt and Anders Riisager\*

#### Inductively coupled plasma mass spectrometry (ICP-MS)

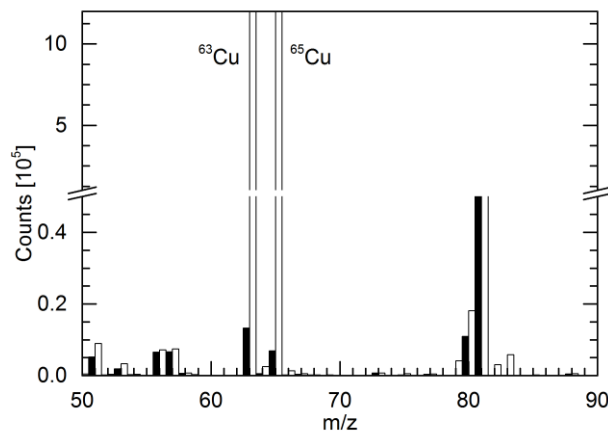

SI Fig. 1. ICP-MS of dissolved CAPS-CuO (white) and filtered solution after reaction for 24 h with CAPS-CuO catalyst (black).

#### Transmission electron microscopy

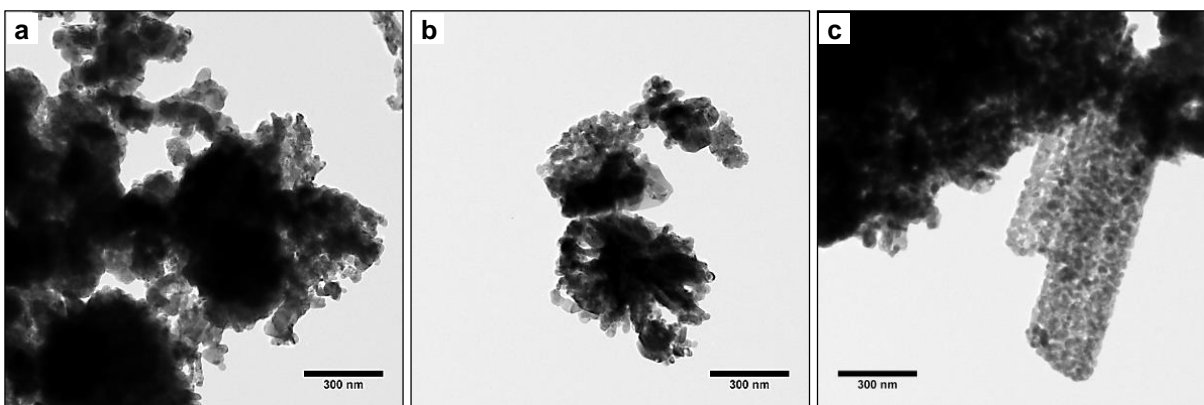

SI Fig. 2. TEM micrographs of as-received commercial CuO (com-CuO).

SI Table 1. Observed lattice spacings derived from the FFTs shown in Fig. 3 compared with calculated values.

|         |                 | CAPS-CuO |                  |                  | MES-CuO         |                  |                  |
|---------|-----------------|----------|------------------|------------------|-----------------|------------------|------------------|
|         |                 | (hkl)    | $d_{\text{obs}}$ | $d_{\text{cal}}$ | (hkl)           | $d_{\text{obs}}$ | $d_{\text{cal}}$ |
| Fig. 3b | (020)           |          | 1.70 Å           | 1.71 Å           | (3 $\bar{1}1$ ) | 1.33 Å           | 1.30 Å           |
|         | (200)           |          | 2.31 Å           | 2.31 Å           | (31 $\bar{1}$ ) | 1.42 Å           | 1.41 Å           |
|         | (110)           |          | 2.73 Å           | 2.75 Å           | (0 $\bar{2}2$ ) | 1.45 Å           | 1.42 Å           |
|         | ( $\bar{1}10$ ) |          | 2.78 Å           | 2.75 Å           | (200)           | 2.33             | 2.31 Å           |
| Fig. 3d | (020)           |          | 1.72 Å           | 1.71 Å           | (1 $\bar{1}1$ ) | 2.35             | 2.32 Å           |
|         | (200)           |          | 2.33 Å           | 2.31 Å           | (11 $\bar{1}$ ) | 2.56 Å           | 2.52 Å           |
|         | (110)           |          | 2.73 Å           | 2.75 Å           | (3 $\bar{1}1$ ) | 1.33 Å           | 1.30 Å           |
|         | ( $\bar{1}10$ ) |          | 2.80 Å           | 2.75 Å           | (200)           | 2.30 Å           | 2.31 Å           |

### X-ray photoelectron spectroscopy (XPS)

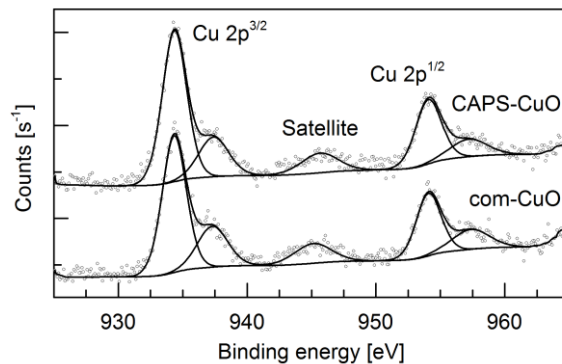

SI Fig. 3. XPS at the Cu 2p transition of CAPS-CuO (top) and MES-CuO (bottom).

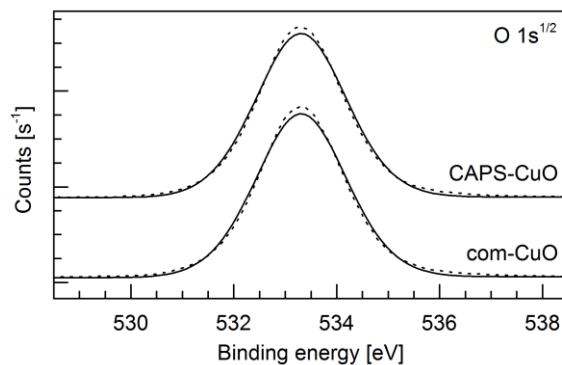

SI Fig. 4. XPS at the O1s transition of CAPS-CuO (top) and com-CuO (bottom).

## X-ray powder diffraction (XRD)

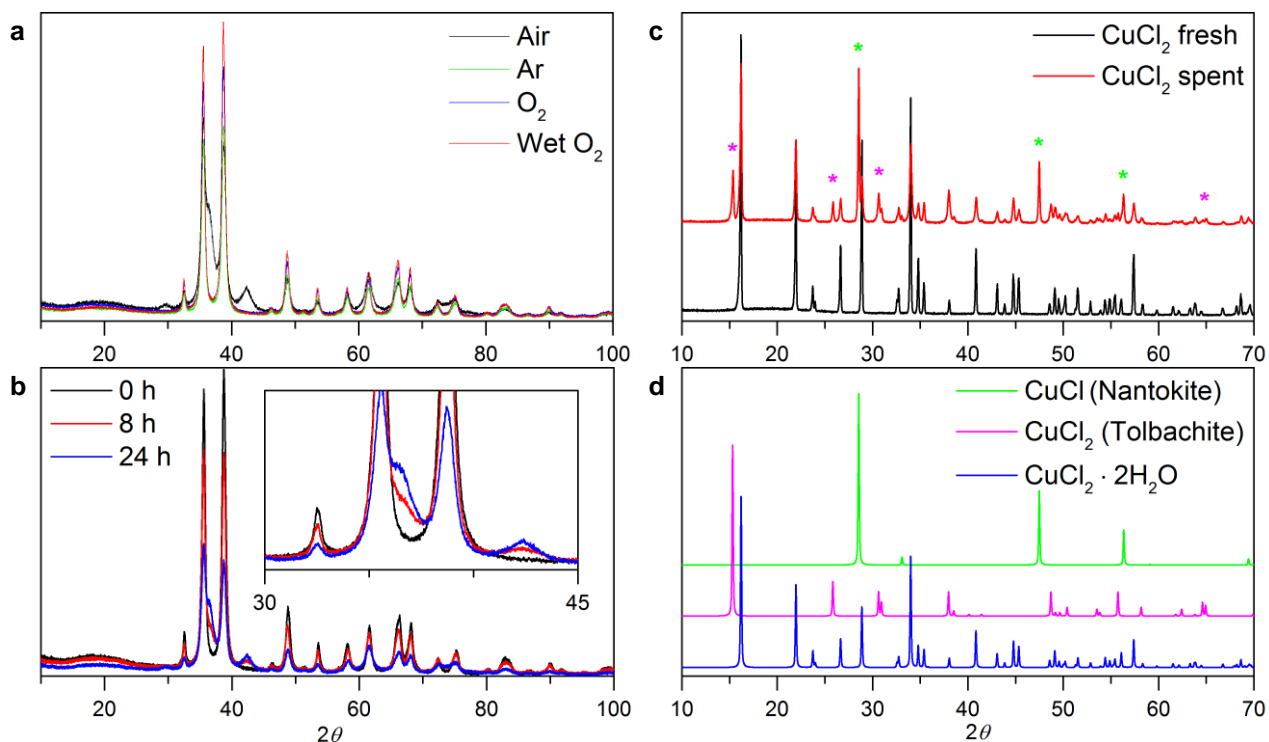

SI Fig. 5. XRD patterns of CAPS-CuO (a) after 24 h reaction in different atmospheres and (b) at different times during reaction. Inset in (b) shows a magnified view of the predominant Cu<sub>2</sub>O peaks at 36.5° and 42.4°, respectively. The XRD patterns in (c) show the structural changes of CuCl<sub>2</sub> when used as catalyst. Reference patterns in (d) support that both dehydration and significant reduction to CuCl occurs.

## Rietveld refinement parameters

The crystal structures of fresh and spent CAPS-CuO and MES-CuO were refined by WINPOW (a local variation of LHMP). The Rietveld refinement for anatacamite was carried out by refining in a  $2\theta$  range from 20° (fresh) and 10° (spent) to 100° in steps of 0.02°. No atomic coordinates were refined. A Voigt profile function and a Chebyshev background polynomial were applied in all refinements. Crystallographic data and refinement summary are given in SI Table 2 and the refined patterns are shown in Fig. 1.

SI Table 2. Crystallographic data and refinement summary for the as-synthesized and spent CuO catalysts.

| Sample                             | CAPS-CuO   |            | CAPS-CuO   |                   |           | MES-CuO    |                   |           |
|------------------------------------|------------|------------|------------|-------------------|-----------|------------|-------------------|-----------|
|                                    | (Fresh)    | (Fresh)    | (Spent)    |                   |           | (Spent)    |                   |           |
| <b>Formula</b>                     | CuO        | CuO        | CuO        | Cu <sub>2</sub> O | Cu        | CuO        | Cu <sub>2</sub> O | Cu        |
| <b>Formula mass (g/mol)</b>        | 79.55      | 79.55      | 79.55      | 143.1             | 63.55     | 79.55      | 143.1             | 63.55     |
| <b>Crystal system</b>              | Monoclinic | Monoclinic | Monoclinic | Cubic             | Cubic     | Monoclinic | Cubic             | Cubic     |
| <b>Space group</b>                 | C 1 c 1    | C 1 c 1    | C 1 c 1    | P n -3 m Z        | F m -3 m  | C 1 c 1    | P n -3 m Z        | F m -3 m  |
| <b><i>a</i> (Å)</b>                | 4.6817(2)  | 4.6833(2)  | 4.6930(4)  | 4.2596(3)         | 3.5938(1) | 4.730(2)   | 4.2631(2)         | 3.6151(1) |
| <b><i>b</i> (Å)</b>                | 3.4175(2)  | 3.4170(2)  | 3.4260(3)  | 4.2596(3)         | 3.5938(1) | 3.415(1)   | 4.2631(2)         | 3.6151(1) |
| <b><i>c</i> (Å)</b>                | 5.1317(3)  | 5.1302(3)  | 5.1240(5)  | 4.2596(3)         | 3.5938(1) | 5.022(2)   | 4.2631(2)         | 3.6151(1) |
| <b><i>α</i> (°)</b>                | 90         | 90         | 90         | 90                | 90        | 90         | 90                | 90        |
| <b><i>β</i> (°)</b>                | 99.266(2)  | 99.275(2)  | 99.332(5)  | 90                | 90        | 99.39(2)   | 90                | 90        |
| <b><i>γ</i> (°)</b>                | 90         | 90         | 90         | 90                | 90        | 90         | 90                | 90        |
| <b><i>V</i> (Å<sup>3</sup>)</b>    | 81.04(1)   | 81.03(1)   | 81.29(2)   | 77.29(2)          | 46.42(5)  | 80.04(9)   | 77.48(1)          | 47.245(5) |
| <b><i>Z</i></b>                    | 4          | 4          | 4          | 2                 | 4         | 4          | 2                 | 4         |
| <b><i>ρ</i> (g/cm<sup>3</sup>)</b> | 6.519      | 6.520      | 6.498      | 6.148             | 9.092     | 6.600      | 6.133             | 8.933     |
| <b>Voigt particle size (Å)</b>     | 175(0)     | 188(1)     | -          | -                 | -         | -          | -                 | -         |
| <b>Composition (wt%)</b>           |            |            | 77.6(3)    | 21.1(1)           | 1.29(4)   | 6.8(1)     | 77.6(3)           | 15.60(8)  |
| <b>No. of parameters</b>           | 12         | 12         |            | 27                |           |            | 24                |           |
| <b><i>R<sub>wp</sub></i> (%)</b>   | 2.49       | 2.81       |            | 4.93              |           |            | 5.50              |           |
| <b><i>χ</i><sup>2</sup></b>        | 0.35       | 0.48       |            | 2.30              |           |            | 2.82              |           |
| <b><i>R<sub>p</sub></i> (%)</b>    | 1.80       | 2.08       |            | 3.50              |           |            | 4.14              |           |
| <b>No. of Bragg reflections</b>    | 46         | 46         | 46         | 12                | 5         | 42         | 12                | 5         |
| <b><i>R<sub>B</sub></i> (%)</b>    | 1.25       | 1.51       | 2.49       | 1.54              | 0.83      | 1.54       | 1.70              | 1.79      |

## XRD of spent and regenerated CAPS-CuO

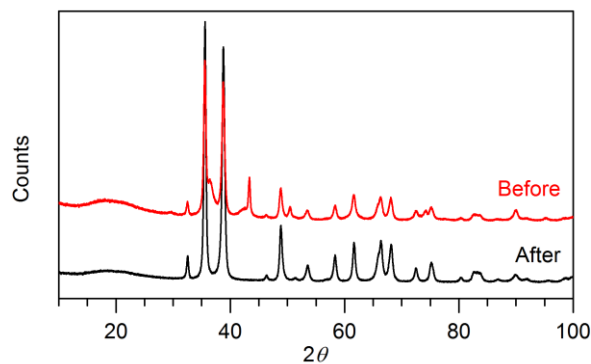

SI Fig. 6. XRD of CAPS-CuO before and after the thermal treatment.

## Thermogravimetric analysis (TGA)

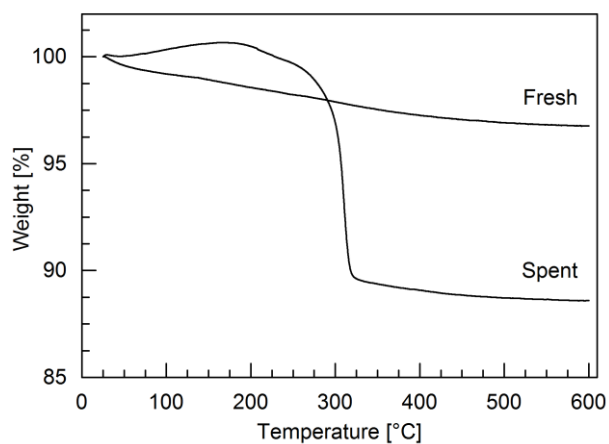

SI Fig. 7. TGA of fresh and spent CAPS-CuO with a heating rate of 10 °C/min.

## Attenuated total reflectance Fourier transformed infrared spectroscopy (ATR-FTIR)

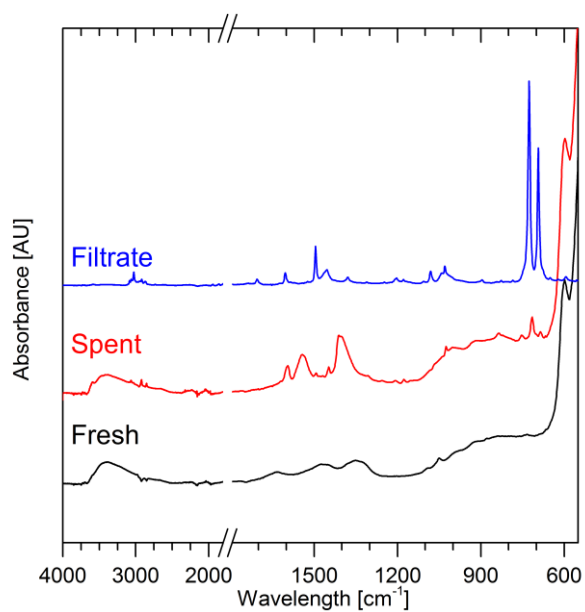

SI Fig. 8. ATR-FTIR spectra of fresh CAPS-CuO (black), spent CAPS-CuO after fourth reaction run without regeneration (red) and the reaction filtrate (blue).
